# Supplementary material
Source: PubMed Central journal article supplement (PMC5981061)
Supplement: AEM.00790-18_zam012188564s1.pdf [file AEM.00790-18_zam012188564s1.pdf]

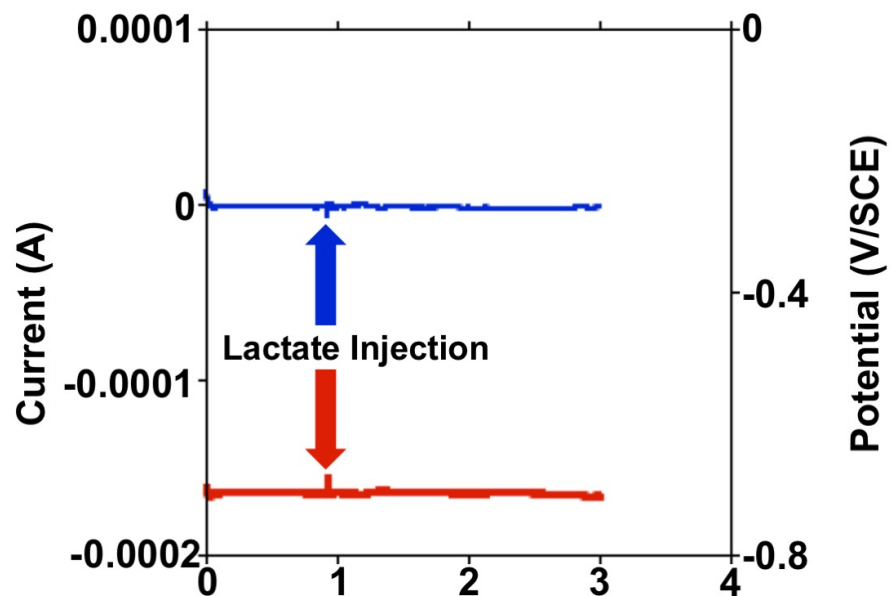

**FIG S1** Current (blue line) and potential in WE1 chamber (red line) in uninoculated ZRA incubations that received lactate amendment in both chambers after approximately one day (arrows).
